# Supplementary material
Source: HighWire-hosted journal article supplement (http://ajnr-stage2.highwire.org/highwire/filestream/183480/field_highwire_adjunct_files/0/0750.pdf)
Supplement: 0750.pdf [file 0750.pdf]

## **MRI SIGNS OF GADOLINIUM RETENTION ARE NOT ASSOCIATED WITH LONG-TERM MOTOR AND COGNITIVE OUTCOMES IN MULTIPLE SCLEROSIS**

### **METHODS**

To evaluate possible differences in terms of DN R1 between patients that did not undergo therapeutic switches (17/63, 27.0%) and patients that switched therapy (46/63, 73.0%) during the follow-up time, a GLM was used accounting for potential confounding factors (age, sex, MS phenotype, DMT, GMV, LL, DD and NR). A similar model was also used to test for possible differences between patients that did not undergo therapeutic switches (17/63, 27.0%) and patients that switched therapy once (11/63, 17.5%) or more (35/63, 55.5%) during the follow-up time.

### **RESULTS**

Patients that did not undergo therapeutic switches and patients that switched therapy were not different in terms of DN R1 values ( $p=0.35$ ). Similarly, patients that did not undergo therapeutic switches were not different from patients that switched therapy once ( $p=0.33$ ) or more than once ( $p=0.61$ ) during the follow-up time.
